# Supplementary material for: Effects on IS1transposition frequency of a mutation in theygjDgene involved in an essential tRNA modification inEscherichia coli
Source: Oxford University Press journal article supplement (doi:10.1111/1574-6968.12227), 2013-08-01
Supplement: fml12227-sup-0001-FigS1-S4-TableS1-S2.pdf [file fml12227-sup-0001-FigS1-S4-TableS1-S2.pdf]

**Supporting information**

**Effects on IS1 transposition frequency of a mutation in the *ygjD* gene  
involved in an essential tRNA Modification in *Escherichia coli***

Chika Hashimoto<sup>1</sup>, Masayuki Hashimoto<sup>2</sup>, Hirofumi Honda<sup>1</sup>, and Jun-ichi Kato<sup>1</sup>

<sup>1</sup>Department of Biological Sciences, Graduate Schools of Science and  
Engineering, Tokyo Metropolitan University, 1-1 Minamiohsawa, Hachioji, Tokyo  
192-0397, Japan.

<sup>2</sup> Institute of Molecular Medicine, Center of Infectious Disease and Signal  
Transduction, National Cheng Kung University Medical College, Tainan  
City, Taiwan.

\*Correspondence: Jun-ichi Kato, Department of Biological Sciences, Graduate  
Schools of Science and Engineering, Tokyo Metropolitan University, 1-1  
Minamiohsawa, Hachioji, Tokyo 192-0397, Japan.

## Figure legends

**Fig. S1.** Cloning of the junction regions of the insertion / deletion in the *yjgD<sub>sup</sub>* mutant genome. (a) The original *yjgD<sub>sup</sub>* mutant has disruptions of the *recA* ( $\Delta recA:Tc$ ) and the *yjgD* genes ( $\Delta yjgD:Sm$ ) and the plasmid (mini-F-*yjgD<sup>ts1</sup>*(Ap)). (b) To obtain the strains, in which the plasmids pSG76A2-A or -B were integrated into the *yjgD<sub>sup</sub>* chromosome by homologous recombination, two plasmids, pACYC184-*yjgD<sup>+</sup>* and mini-F-*recA<sup>+</sup>* (Km), were introduced into the *yjgD<sub>sup</sub>* mutant. (c) Then the plasmids pSG76A2-A or -B and a helper plasmid, pPIR-K, were introduced into the resultant strain. (d) And the strains with the integrated plasmids were obtained at 42°C. The chromosomal DNA was prepared, digested with the restriction enzymes, ligated, and introduced into DH1 together with pPIR-K. The plasmids carrying the junction regions were obtained and sequenced. The arrows on the cloned plasmids indicate the primers for sequencing.

**Fig. S2.** The PFGE patterns predicted from the genome sequences. Because Tn10 has an *XbaI* site, a 206,624 base pair fragment was split to ca. 171 KB and ca. 45 kb

bands. In the presence of Dam methylase, two *XbaI* sites (3,861,916 and 4,308,586) are not digested by *XbaI*.

**Fig. S3.** Growth of the *ygjD*<sub>sup</sub> mutant with the *dinG*, *rep*, and *rnhA* multi-copy plasmids. The *ygjD*<sub>sup</sub> mutant and the isogenic *ygjD*<sup>+</sup> strain were transformed with pACYC184 and its derivatives carrying the *dinG*, *rep*, and *rnhA* genes. The transformants were incubated on Antibiotic Medium 3 containing Cm and streptomycin at 30, 37, or 42°C.

**Fig. S4.** Junction sequences of the insertion / deletion in the *ygjD*<sub>sup</sub> mutant genome. Sequences of the three junctions are shown: *insB* - *yjgJ* ( 4,517,262 - 4,472,838); *yjhG* - *insA* (4,520,435 - *insA*); *insB* - *ubiD* (*insB* - 4,023,119). The putative junctions are indicated by arrows.

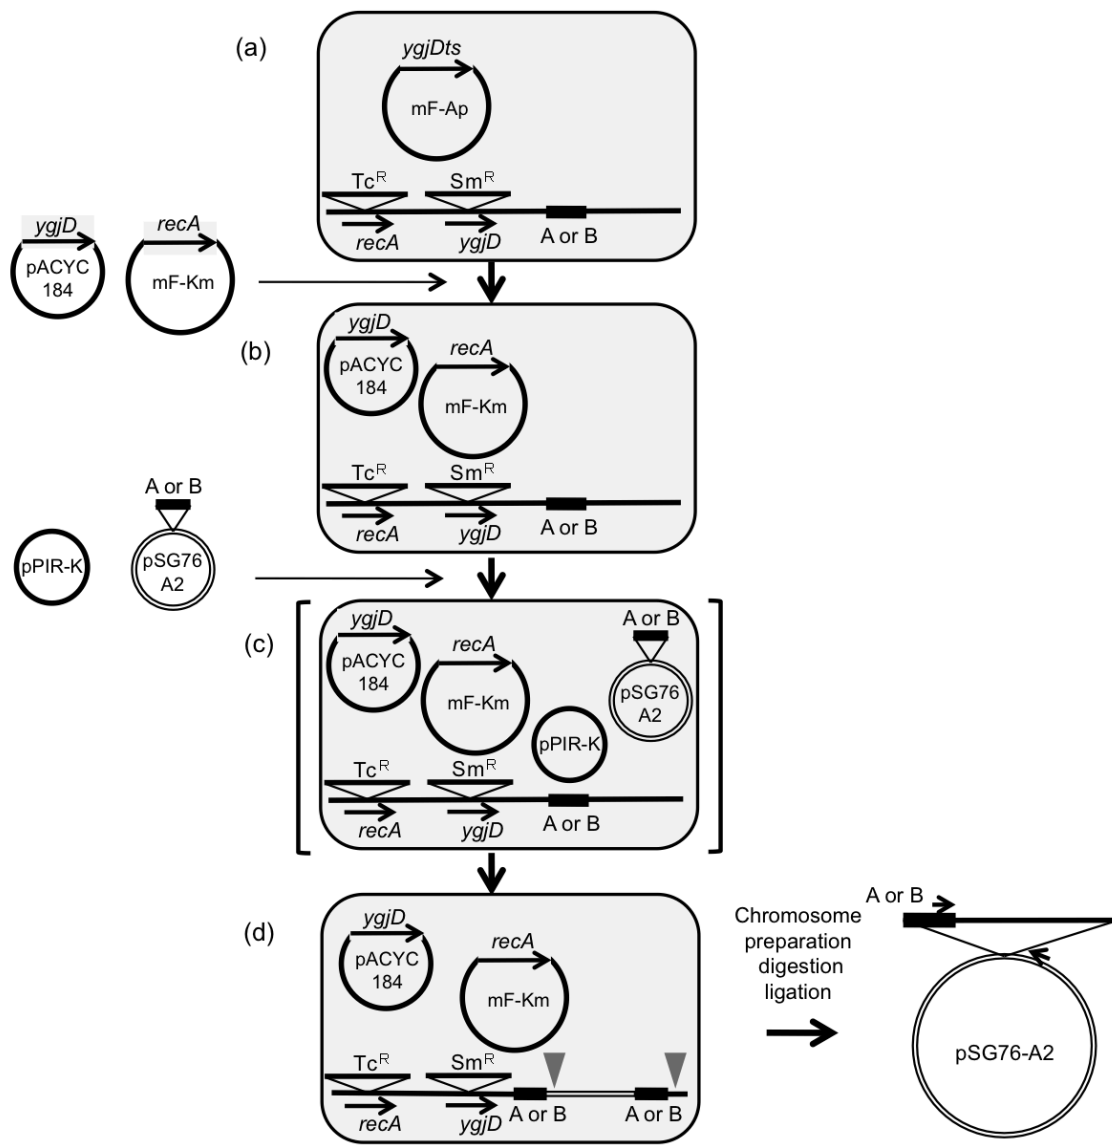

Fig. S1. Hashimoto *et al.*

| (1) <i>NotI</i> |                               | (2) <i>XbaI</i> (-Dam methylation) |                               | (3) <i>XbaI</i> (+Dam methylation) |                               |
|-----------------|-------------------------------|------------------------------------|-------------------------------|------------------------------------|-------------------------------|
| < MG1655 >      | < <i>ygjD<sub>sup</sub></i> > | < MG1655 >                         | < <i>ygjD<sub>sup</sub></i> > | < MG1655 >                         | < <i>ygjD<sub>sup</sub></i> > |
| 1003721 base    | 1003721 base                  | 440059 base                        | 440059 base                   | 440059 base                        | 440059 base                   |
|                 | 377505 base                   | 335008 base                        | 335008 base                   | 335008 base                        | 335008 base                   |
| 361369 base     | 361369 base                   | 323965 base                        | 323965 base                   | 323965 base                        | 323965 base                   |
| 358533 base     |                               | 269545 base                        | 269545 base                   | 297926 base                        | 297926 base                   |
| 281227 base     | 281227 base                   | 262133 base                        | 262133 base                   |                                    | 276555 base                   |
| 273618 base     | 273618 base                   | 254644 base                        | 254644 base                   | 269545 base                        | 269545 base                   |
| 261674 base     | 261674 base                   | 248418 base                        | 248418 base                   | 262133 base                        | 262133 base                   |
| 250536 base     | 250536 base                   | 224937 base                        | 224937 base                   | 254644 base                        | 254644 base                   |
| 250163 base     | 250163 base                   | 214863 base                        | 214863 base                   | 248418 base                        | 248418 base                   |
| 248520 base     | 248520 base                   | 206624 base                        | 206624 base                   | 224937 base                        | 224937 base                   |
|                 | 248520 base                   | 197148 base                        | 197148 base                   | 214863 base                        | 214863 base                   |
| 214239 base     | 214239 base                   |                                    | 195472 base                   | 206624 base                        | (206624 base)                 |
| 207784 base     | 207784 base                   |                                    | 175777 base                   |                                    | 195472 base                   |
| 193356 base     | 193356 base                   | 155297 base                        | 155297 base                   | 155297 base                        | 155297 base                   |
|                 | 174719 base                   | 149210 base                        | 149210 base                   | 149210 base                        | 149210 base                   |
| 156067 base     | 156067 base                   | 117291 base                        | 117291 base                   | 137243 base                        | 137243 base                   |
| 132769 base     | 132769 base                   | 106065 base                        | 106065 base                   | 117291 base                        | 117291 base                   |
| 108684 base     | 108684 base                   | 105763 base                        | 105763 base                   | 106065 base                        | 106065 base                   |
| 98648 base      | 98648 base                    | 105747 base                        | 105747 base                   | 105763 base                        | 105763 base                   |
| 92214 base      | 92214 base                    | 100778 base                        | 100778 base                   | 105747 base                        | 105747 base                   |
| 40597 base      | 40597 base                    |                                    | 100778 base                   | 94058 base                         | 94058 base                    |
| 36074 base      | 36074 base                    | 94058 base                         | 94058 base                    | 86685 base                         | 86685 base                    |
| 35142 base      | 35142 base                    | 86685 base                         | 86685 base                    | 72559 base                         | 72559 base                    |
| 15443 base      | 15443 base                    | 79553 base                         | 79553 base                    | 66883 base                         | 66883 base                    |
| 14962 base      | 14962 base                    | 72559 base                         | 72559 base                    | 48824 base                         | 48824 base                    |
|                 | 4335 base                     | 66883 base                         |                               | 48417 base                         | 48417 base                    |
| 4335 base       | 4335 base                     | 57690 base                         | 57690 base                    | 41402 base                         | 41402 base                    |
|                 |                               | 48824 base                         | 48824 base                    |                                    | 41402 base                    |
|                 |                               | 48417 base                         | 48417 base                    | 39700 base                         | 39700 base                    |
|                 |                               | 41402 base                         | 41402 base                    | 33538 base                         | 33538 base                    |
|                 |                               |                                    |                               | 28987 base                         | 28987 base                    |
|                 |                               | 39700 base                         | 39700 base                    | 28538 base                         | 28538 base                    |
|                 |                               | 33538 base                         | 33538 base                    | 26503 base                         | 26503 base                    |
|                 |                               | 28987 base                         | 28987 base                    | 21775 base                         | 21775 base                    |
|                 |                               | 28538 base                         | 28538 base                    | 14081 base                         | 14081 base                    |
|                 |                               | 26503 base                         | 26503 base                    | 12523 base                         | 12523 base                    |
|                 |                               | 21775 base                         | 21775 base                    | 12223 base                         | 12223 base                    |
|                 |                               | 14081 base                         | 14081 base                    | 6055 base                          | 6055 base                     |
|                 |                               | 12523 base                         | 12523 base                    | 2067 base                          | 2067 base                     |
|                 |                               | 12223 base                         | 12223 base                    | 119 base                           | 119 base                      |
|                 |                               | 6055 base                          | 6055 base                     |                                    |                               |
|                 |                               | 2067 base                          | 2067 base                     |                                    |                               |
|                 |                               | 119 base                           | 119 base                      |                                    |                               |

Fig. S2. Hashimoto *et al.*

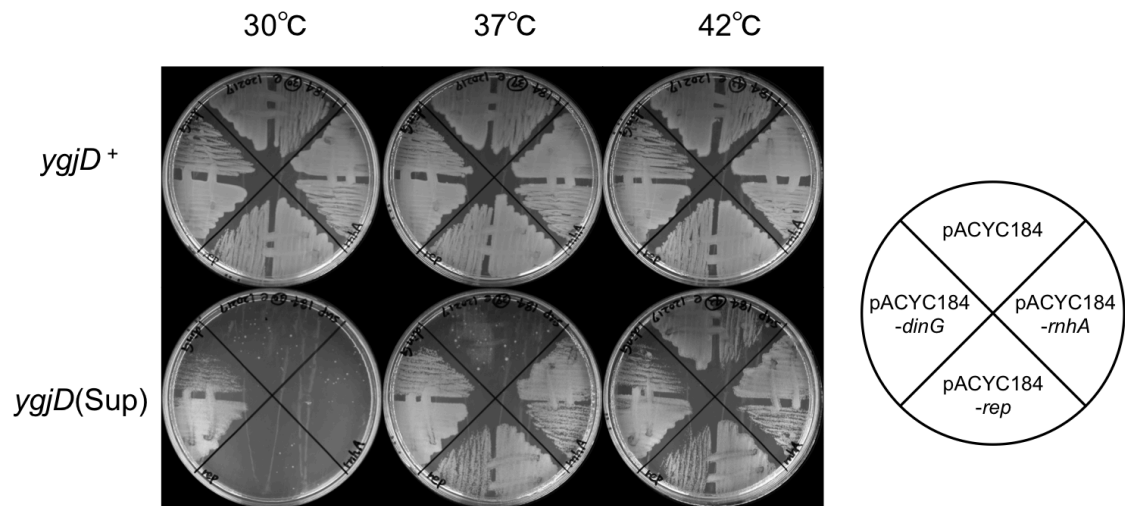

Fig. S3 Hashimoto *et al.*

***insB-yjgJ***

*insB* CACTATCAATAAGTTGGAGTCATTACCGACCATGTTTATTTTCATACATT  
genome CACTATCAGTAAGTTGGAGTCATTACCCGAAAAGATAATCAATTCCGCT  
*yjgJ* AAACAACGTTTCATTTCTATCGTTATACGAAAAGATAATCAATTCCGCT  
↑

***yjhG-insA***

*yjhG* CCGGAGGCCCCATCGGTAAATTACGCACCGGGGATTTAATTGAAATTAA  
genome CCGGAGGCCCCATCGGTAAATTAGGTGATGCTGCCAACTTACTGATTTA  
*insA* CTGCCCTAAAGGATGGGGATTTTCGGTAATGCTGCCAACTTACTGATTTA  
↑

***ubiD-insB***

*ubiD* CGGCACGCAAAGTGCGGTCAGCAATTTTCAGTGATTTCCAGATGCGGATC  
genome CGGCACGCAAAGTGCGGTCAGCAATTTTCGGTAATGACTCCAACCTATTG  
*insB* ACCCACAATGTATGAAATAAACATGGTTCGGTAATGACTCCAACCTATTG  
↑↑↑

Fig. S4. Hashimoto *et al.*

Table S1 Primer sequences

| Primer name | Sequence                                                            |
|-------------|---------------------------------------------------------------------|
| 182-34      | 5'-CCGGATCCTTTCCCGTCAACCTTGATG-3'                                   |
| 182-35      | 5'-CCGGATCCTGCGATAGTCCATTACGAC-3'                                   |
| 454-59      | 5'-CCGGATCCACTGACTTGTGTACCAGGTC-3'                                  |
| 454-60      | 5'-CCGGATCCTTGCTCAGGAAAGCCAGTGG-3'                                  |
| 495-1       | 5'-CACCGAGGATGAGAAGTGC-3'                                           |
| 500-9       | 5'-CATTTCCCGGTTAATACAGGTATACAAAAGTGGATAGACTGGTGTCCCTGTTGATACC-3'    |
| 500-10      | 5'-CCATATCTACATGGGGCAGTTGTTTATTCTTTTAGTGTGGCACTTATTCAGGCGTAGCAC-3'  |
| 500-11      | 5'-ATGGGTCGCTACCCTGTTATGAGAGGACGTTATGCCACTACTGGTGTCCCTGTTGATACC-3'  |
| 500-12      | 5'-ACAACAGGTTGGCTCACTGGCAAGAACCCGATTATAAAACCCTTATTCAGGCGTAGCAC-3'   |
| 500-13      | 5'-CAGGGCATTACCAGTCTGAGGAGAACTCATGTCTGTTCTGGTGTCCCTGTTGATACC-3'     |
| 500-14      | 5'-TTCAGGTGTCTGGATGTTTTTATTTATGCTTTCAGTTTTTCACTTATTCAGGCGTAGCAC-3'  |
| 500-29      | 5'-CCCTGCAGCGCAAGCTGGTTGCCGAGTTTTTC-3'                              |
| 500-30      | 5'-CCGAGCTCAATCAGTAAGTTGGCAGCATTACCG-3'                             |
| 500-32      | 5'-CCGCATGCATCGCATTCTCTATCGCTTTATCGG-3'                             |
| 500-34      | 5'-CCGAATTCGCTTACCACCGATTCTTGAAGCATC-3'                             |
| 500-35      | 5'-AAAGGTGTGGCGAAGGTTTATCTGTCCGAG-3'                                |
| 500-36      | 5'-TAACCTCGCGCATACAACCGGGCAGTGATG-3'                                |
| tatD-CmN    | 5'-ACAGTGTGAAGAATACCGAGTTCGCAAACTCTAAAACGCCTGGTGTCCCTGTTGATACC-3'   |
| tatD-CmC    | 5'-CCGTCAGGGCGGTTGTCATATGGAGTACAGGATGTTTGATCACTTATTCAGGCGTAGCAC-3'  |
| fadA-CmN    | 5'-CGCATCCGGCAAGTGGTTAAACCCGCTCAAACACCGTCGCCTGGTGTCCCTGTTGATACC-3'  |
| fadA-CmC    | 5'-GAAAACGGCTTAAGGAGTCACAATGGAACAGGTTGTCATTCCTTATTCAGGCGTAGCAC-3'   |
| ppc-CmN     | 5'-GGTTTGAGAAGAGGAAGATTAGCCGGTATTACGCATACCCTGGTGTCCCTGTTGATACC-3'   |
| ppc-CmC     | 5'-TCAAACGATAAGATGGGGTGTCTGGGGTAAATGAACGAACACTTATTCAGGCGTAGCAC-3'   |
| malK-CmN    | 5'-AGGCTTTGTGTGTTTTGTGGGGTGTCTAAACGCCCGGCTCCTGGTGTCCCTGTTGATACC-3'  |
| malK-CmC    | 5'-CGATGACAGGTTGTTACAAAGGGAGAAGGGCATGGCGAGCCACTTATTCAGGCGTAGCAC-3'  |
| mgtA-CmN    | 5'-ATCGTGCCAGTTTATTCTTTATTGCCAGCCGTAACGACGCTGGTGTCCCTGTTGATACC-3'   |
| mgtA-CmC    | 5'-GGGACTCCTTATGTTTAAAGAAATTTTACCCGGCTCATTCACTTATTCAGGCGTAGCAC-3'   |
| idnT-CmN    | 5'-CCCCGAAACTACATCACAATATTTTATTCTTTCAGTGCAACTGGTGTCCCTGTTGATACC-3'  |
| idnT-CmC    | 5'-GCACTAATAAGAGATAAAGACTATGCCATTAATCATTATTCCTTATTCAGGCGTAGCAC-3'   |
| groES-CmN   | 5'-AGATACGGACTTTCTCAAAGGAGAGTTATCAATGAATATT cTggTgTcccTgTgATAcc-3'  |
| groEL-CmC   | 5'-GGTTTGTTTATTTCTGCGAGGTGCAGGGCAATTACATCAT cAcTTATTcAggcgTAgcAc-3' |
| lacI-CmN    | 5'-GAGTCAATTCAGGGTGGTGAATGTGAAACCAGTAACGTTA cTggTgTcccTgTgATAcc-3'  |
| lacA-CmC    | 5'-gcccagcgtatcaggcaattttataattaaactgacgacAcTTATTcAggcgTAgcAc-3'    |



Table S2 Transcription of collision-related genes in the *ygjD*<sup>ts</sup> mutant.

| Gene        | <i>ygjD</i> (Ts) signal intensity | Wild-type signal intensity | Ratio  |
|-------------|-----------------------------------|----------------------------|--------|
| <i>dinG</i> | 326.0                             | 284.9                      | 1.1443 |
|             | 453.4                             | 515.6                      | 0.8794 |
| <i>rep</i>  | 909.1                             | 1272.0                     | 0.7147 |
|             | 652.9                             | 463.9                      | 1.2074 |
| <i>uvrD</i> | 1664.8                            | 1649.3                     | 1.0094 |
|             | 1457.2                            | 1352.6                     | 1.0773 |
| <i>mfd</i>  | 1217.4                            | 1045.9                     | 1.1640 |
|             | 1054.5                            | 707.3                      | 1.4909 |
| <i>rnhA</i> | 1823.9                            | 1327.2                     | 1.3742 |
|             | 1659.4                            | 1881.8                     | 0.8818 |

The data are derived from the microarray experiments (Hashimoto *et al.*, 2011).

Upper, cells grown at 37°C; lower, cells grown at 30°C
